# Supplementary material for: Direct Detection of Carbapenemase-Producing Klebsiella pneumoniae by MALDI-TOF Analysis of Full Spectra Applying Machine Learning
Source: PubMed Central journal article supplement (PMC10281162; doi:10.1128/jcm.01751-22), 2023-05-18
Supplement: jcm.01751-22-s0001.pdf [file jcm.01751-22-s0001.pdf]

## Supplementary material.

**Table 1. Detailed information for all isolates used in the study.**

### a. Training

| Isolate | Sequencing code | ST  | Resistance mechanism | Location                                               |
|---------|-----------------|-----|----------------------|--------------------------------------------------------|
| 1       | AI2583          | 11  | OXA-48               | Hospital Universitario Gregorio Marañón (Madrid)       |
| 2       | AI2585          | 405 | OXA-48               | Hospital Universitario Gregorio Marañón (Madrid)       |
| 3       | AI2586          | 11  | OXA-48               | Hospital Universitario Gregorio Marañón (Madrid)       |
| 4       | AI2587          | 11  | OXA-48               | Hospital Universitario Gregorio Marañón (Madrid)       |
| 5       | AI2588          | 512 | KPC-3                | Hospital Universitario Gregorio Marañón (Madrid)       |
| 6       | AI2589          | 11  | OXA-48               | Hospital Universitario Gregorio Marañón (Madrid)       |
| 7       | AI2590          | 11  | OXA-48               | Hospital Universitario Gregorio Marañón (Madrid)       |
| 8       | AI2818          | 15  | OXA-48               | Hospital Universitario Gregorio Marañón (Madrid)       |
| 9       | AI2819          | 15  | OXA-48               | Hospital Universitario Gregorio Marañón (Madrid)       |
| 10      | AI2593          | 219 | OXA-48               | Hospital Universitario Gregorio Marañón (Madrid)       |
| 11      | AI2594          | 15  | OXA-48               | Hospital Universitario Gregorio Marañón (Madrid)       |
| 12      | AI2595          | 405 | OXA-48               | Hospital Universitario Gregorio Marañón (Madrid)       |
| 13      | AI2596          | 11  | OXA-48               | Hospital Universitario Gregorio Marañón (Madrid)       |
| 14      | AI2861          | 11  | OXA-48               | Hospital Universitario Gregorio Marañón (Madrid)       |
| 15      | AI2597          | 11  | OXA-48               | Hospital Universitario Gregorio Marañón (Madrid)       |
| 16      | AI2600          | 405 | OXA-48               | Hospital Universitario Gregorio Marañón (Madrid)       |
| 17      | AI2822          | 392 | OXA-48               | Hospital Universitario Gregorio Marañón (Madrid)       |
| 18      | AI2823          | 11  | OXA-48               | Hospital Universitario Gregorio Marañón (Madrid)       |
| 19      | AI2601          | 11  | OXA-48               | Hospital Universitario Gregorio Marañón (Madrid)       |
| 20      | AI2824          | 11  | OXA-48               | Hospital Universitario Gregorio Marañón (Madrid)       |
| 21      | AI2825          | 11  | OXA-48               | Hospital Universitario Gregorio Marañón (Madrid)       |
| 22      | AI2603          | 11  | OXA-48               | Hospital Universitario Gregorio Marañón (Madrid)       |
| 23      | AI2604          | 11  | OXA-48               | Hospital Universitario Gregorio Marañón (Madrid)       |
| 24      | AI2605          | 11  | OXA-48               | Hospital Universitario Gregorio Marañón (Madrid)       |
| 25      | AI2607          | 392 | OXA-48               | Hospital Universitario Gregorio Marañón (Madrid)       |
| 26      | AI2829          | 15  | OXA-48               | Hospital Universitario Lucus Augusti (Lugo)            |
| 27      | AI2830          | 147 | NDM-1                | Hospital Universitario Lucus Augusti (Lugo)            |
| 28      | AI2621          | 405 | OXA-48               | Hospital Universitari Germans Trias i Pujol (Badalona) |
| 29      | AI2622          | 405 | OXA-48               | Hospital Universitari Germans Trias i Pujol (Badalona) |
| 30      | AI3021          | 15  | OXA-48               | Hospital General de Alicante (Alicante)                |
| 31      | AI2626          | 11  | VIM-1                | Hospital Puerta del Mar (Cádiz)                        |

|    |        |      |        |                                                     |
|----|--------|------|--------|-----------------------------------------------------|
| 32 | AI2835 | 512  | KPC-3  | Hospital Puerta del Mar (Cádiz)                     |
| 33 | AI2627 | 512  | KPC-3  | Hospital Puerta del Mar (Cádiz)                     |
| 34 | AI2628 | 512  | KPC-3  | Hospital Puerta del Mar (Cádiz)                     |
| 35 | AI2630 | 15   | OXA-48 | Hospital Puerta del Mar (Cádiz)                     |
| 36 | AI2631 | 512  | KPC-3  | Hospital Puerta del Mar (Cádiz)                     |
| 37 | AI2836 | 512  | KPC-3  | Hospital Puerta del Mar (Cádiz)                     |
| 38 | AI2632 | 512  | KPC-3  | Hospital Puerta del Mar (Cádiz)                     |
| 39 | AI2635 | 392  | OXA-48 | Hospital Clinic (Barcelona)                         |
| 40 | AI2838 | 307  | OXA-48 | Hospital Clinic (Barcelona)                         |
| 41 | AI2636 | 392  | OXA-48 | Hospital Clinic (Barcelona)                         |
| 42 | AI2639 | 392  | OXA-48 | Hospital Clinic (Barcelona)                         |
| 43 | AI2640 | 392  | OXA-48 | Hospital Clinic (Barcelona)                         |
| 44 | AI2641 | 392  | OXA-48 | Hospital Clinic (Barcelona)                         |
| 45 | AI2842 | 1401 | OXA-48 | Hospital Clinic (Barcelona)                         |
| 46 | AH0326 | 392  | OXA-48 | Hospital Clinic (Barcelona)                         |
| 47 | AI2844 | 198  | OXA-48 | Hospital Clinic (Barcelona)                         |
| 48 | AI2846 | 45   | OXA-48 | Hospital Clinic (Barcelona)                         |
| 49 | AI2847 | 307  | OXA-48 | Hospital Clinic (Barcelona)                         |
| 50 | AI2848 | 1083 | VIM-1  | Hospital Clinic (Barcelona)                         |
| 51 | AH0327 | 392  | OXA-48 | Hospital Clinic (Barcelona)                         |
| 52 | AI2850 | 151  | OXA-48 | Hospital Universitario Mutua de Terrassa (Terrassa) |
| 53 | AI2851 | 152  | OXA-48 | Hospital Universitario Mutua de Terrassa (Terrassa) |
| 54 | AI2856 | 147  | OXA-48 | Hospital Universitario Mutua de Terrassa (Terrassa) |
| 55 | AI2862 | 405  | OXA-48 | Hospital Universitario La Paz (Madrid)              |
| 56 | AI2867 | 39   | VIM-1  | Hospital Universitario La Paz (Madrid)              |
| 57 | AI2868 | 307  | OXA-48 | Hospital Universitario La Paz (Madrid)              |
| 58 | AI3024 | 15   | OXA-48 | Hospital Universitario La Paz (Madrid)              |
| 59 | AI2870 | 11   | OXA-48 | Hospital Universitario Ramón y Cajal (Madrid)       |
| 60 | AI2643 | 307  | KPC    | Hospital Universitario Ramón y Cajal (Madrid)       |
| 61 | AI2873 | 11   | OXA-48 | Hospital Universitario Ramón y Cajal (Madrid)       |
| 62 | AI2874 | 11   | OXA-48 | Hospital Universitario Ramón y Cajal (Madrid)       |
| 63 | AI2875 | 11   | OXA-48 | Hospital Universitario Ramón y Cajal (Madrid)       |
| 64 | AI2876 | 11   | OXA-48 | Hospital Universitario Ramón y Cajal (Madrid)       |
| 65 | AI2644 | 307  | KPC-3  | Hospital Universitario Ramón y Cajal (Madrid)       |
| 66 | AI2878 | 11   | OXA-48 | Hospital Universitario Ramón y Cajal (Madrid)       |

|     |        |      |        |                                               |
|-----|--------|------|--------|-----------------------------------------------|
| 67  | AI2879 | 11   | OXA-48 | Hospital Universitario Ramón y Cajal (Madrid) |
| 68  | AI2880 | 101  | NDM-1  | Hospital Universitario Ramón y Cajal (Madrid) |
| 69  | AI3025 | 15   | VIM-1  | Hospital Universitario Ramón y Cajal (Madrid) |
| 70  | AI2882 | 307  | OXA-48 | Hospital Universitario Ramón y Cajal (Madrid) |
| 71  | AI2645 | 307  | KPC-3  | Hospital Universitario Ramón y Cajal (Madrid) |
| 72  | AI2885 | 307  | VIM-1  | Hospital Universitario Ramón y Cajal (Madrid) |
| 73  | AI2647 | 307  | KPC-3  | Hospital Universitario Ramón y Cajal (Madrid) |
| 74  | AI2892 | 11   | OXA-48 | Hospital Universitario Ramón y Cajal (Madrid) |
| 75  | AI2648 | 307  | KPC-3  | Hospital Universitario Ramón y Cajal (Madrid) |
| 76  | AI2893 | 45   | OXA-48 | Hospital Universitario Ramón y Cajal (Madrid) |
| 77  | AI2895 | 11   | OXA-48 | Hospital Universitario Ramón y Cajal (Madrid) |
| 78  | AI2649 | 307  | KPC    | Hospital Universitario Ramón y Cajal (Madrid) |
| 79  | AI2896 | 307  | OXA-48 | Hospital Universitario Ramón y Cajal (Madrid) |
| 80  | AI2897 | 11   | OXA-48 | Hospital Universitario Ramón y Cajal (Madrid) |
| 81  | AI2650 | 307  | KPC-3  | Hospital Universitario Ramón y Cajal (Madrid) |
| 82  | AI2651 | 459  | KPC-3  | Hospital Universitario Ramón y Cajal (Madrid) |
| 83  | AI2898 | 101  | NDM-1  | Hospital Universitario Ramón y Cajal (Madrid) |
| 84  | AI2900 | 11   | OXA-48 | Hospital Universitario Ramón y Cajal (Madrid) |
| 85  | AI2652 | 307  | KPC-3  | Hospital Universitario Ramón y Cajal (Madrid) |
| 86  | AI2653 | 307  | KPC-3  | Hospital Universitario Ramón y Cajal (Madrid) |
| 87  | AI2901 | 307  | KPC-3  | Hospital Universitario Ramón y Cajal (Madrid) |
| 88  | AI2654 | 307  | KPC    | Hospital Universitario Ramón y Cajal (Madrid) |
| 89  | AI2902 | 11   | OXA-48 | Hospital Universitario Ramón y Cajal (Madrid) |
| 90  | AI2655 | 307  | KPC-3  | Hospital Universitario Ramón y Cajal (Madrid) |
| 91  | AI3027 | 3362 | OXA-48 | Complejo Hospitalario de Jaén (Jaén)          |
| 92  | AI2906 | 392  | OXA-48 | Hospital Universitario La Princesa (Madrid)   |
| 93  | AI2907 | 5001 | OXA-48 | Hospital Universitario La Princesa (Madrid)   |
| 94  | AI2908 | 39   | OXA-48 | Hospital Universitario La Princesa (Madrid)   |
| 95  | AI2909 | 11   | VIM-1  | Hospital Universitario La Princesa (Madrid)   |
| 96  | AI2911 | 392  | OXA-48 | Hospital Universitario La Princesa (Madrid)   |
| 97  | AI2912 | 392  | OXA-48 | Hospital Universitario La Princesa (Madrid)   |
| 98  | AI2914 | 11   | OXA-48 | Hospital Universitario La Princesa (Madrid)   |
| 99  | AI3028 | 392  | OXA-48 | Hospital Universitario La Princesa (Madrid)   |
| 100 | AI2917 | 392  | OXA-48 | Hospital Universitario La Princesa (Madrid)   |
| 101 | AI2919 | 11   | OXA-48 | Hospital Universitario La Princesa (Madrid)   |

|     |        |      |        |                                                           |
|-----|--------|------|--------|-----------------------------------------------------------|
| 102 | AI2922 | 11   | OXA-48 | Hospital Universitario La Princesa (Madrid)               |
| 103 | AI2923 | 392  | OXA-48 | Hospital Universitario La Princesa (Madrid)               |
| 104 | AI2925 | 340  | OXA-48 | Hospital Universitario La Princesa (Madrid)               |
| 105 | AI2926 | 11   | OXA-48 | Hospital Universitario La Princesa (Madrid)               |
| 106 | AI2927 | 392  | OXA-48 | Hospital Universitario La Princesa (Madrid)               |
| 107 | AI2929 | 392  | OXA-48 | Hospital Universitario La Princesa (Madrid)               |
| 108 | AI2931 | 392  | OXA-48 | Hospital Universitario La Princesa (Madrid)               |
| 109 | AI2932 | 392  | OXA-48 | Hospital Universitario La Princesa (Madrid)               |
| 110 | AI3030 | 307  | OXA-48 | Hospital Universitario La Princesa (Madrid)               |
| 111 | AI2934 | 395  | NDM-1  | Hospital Virgen de la Macarena (Sevilla)                  |
| 112 | AI2940 | 258  | KPC-3  | Hospital Universitario Son de Espases (Palma de Mallorca) |
| 113 | AI2660 | 11   | VIM-1  | Hospital Universitario Son de Espases (Palma de Mallorca) |
| 114 | AI2669 | 15   | OXA-48 | Hospital Universitario Central de Asturias (Oviedo)       |
| 115 | AI2670 | 405  | OXA-48 | Hospital Universitario Central de Asturias (Oviedo)       |
| 116 | AI2671 | 147  | OXA-48 | Hospital Universitario Central de Asturias (Oviedo)       |
| 117 | AI2675 | 326  | OXA-48 | Hospital Universitario Central de Asturias (Oviedo)       |
| 118 | AI2676 | 147  | OXA-48 | Hospital Universitario Central de Asturias (Oviedo)       |
| 119 | AI2677 | 405  | OXA-48 | Hospital Universitario Central de Asturias (Oviedo)       |
| 120 | AI2678 | 147  | OXA-48 | Hospital Universitario Central de Asturias (Oviedo)       |
| 121 | AI2681 | 326  | OXA-48 | Hospital Universitario Central de Asturias (Oviedo)       |
| 122 | AI2682 | 147  | OXA-48 | Hospital Universitario Central de Asturias (Oviedo)       |
| 123 | AN2337 | 147  | OXA-48 | Hospital Universitario Central de Asturias (Oviedo)       |
| 124 | AI3034 | 4387 | OXA-48 | Hospital Universitario Central de Asturias (Oviedo)       |
| 125 | AI3035 | 147  | OXA-48 | Hospital Universitario Central de Asturias (Oviedo)       |
| 126 | AI2686 | 326  | OXA-48 | Hospital Universitario Central de Asturias (Oviedo)       |
| 127 | AI2687 | 147  | OXA-48 | Hospital Universitario Central de Asturias (Oviedo)       |
| 128 | AH0330 | 15   | OXA-48 | Hospital Universitario Central de Asturias (Oviedo)       |
| 129 | AI2691 | 147  | OXA-48 | Hospital Universitario Central de Asturias (Oviedo)       |
| 130 | AI3037 | 147  | OXA-48 | Hospital Universitario Central de Asturias (Oviedo)       |
| 131 | AI2953 | 307  | OXA-48 | Hospital Universitario Central de Asturias (Oviedo)       |
| 132 | AI2698 | 15   | OXA-48 | Hospital Universitario Central de Asturias (Oviedo)       |
| 133 | AI3039 | 307  | OXA-48 | Hospital de Guadalajara (Guadalajara)                     |
| 134 | AI2958 | 11   | OXA-48 | Hospital de Guadalajara (Guadalajara)                     |
| 135 | AI2960 | 307  | OXA-48 | Hospital de Guadalajara (Guadalajara)                     |
| 136 | AI2962 | 307  | OXA-48 | Hospital de Guadalajara (Guadalajara)                     |

|     |        |      |        |                                                          |
|-----|--------|------|--------|----------------------------------------------------------|
| 137 | AI2965 | 307  | OXA-48 | Hospital de Guadalajara (Guadalajara)                    |
| 138 | AI2966 | 307  | OXA-48 | Hospital de Guadalajara (Guadalajara)                    |
| 139 | AI3040 | 307  | OXA-48 | Hospital de Guadalajara (Guadalajara)                    |
| 140 | AI2967 | 405  | OXA-48 | Hospital de Guadalajara (Guadalajara)                    |
| 141 | AI2968 | 307  | OXA-48 | Hospital de Guadalajara (Guadalajara)                    |
| 142 | AI2969 | 307  | OXA-48 | Hospital de Guadalajara (Guadalajara)                    |
| 143 | AI2973 | 11   | OXA-48 | Hospital de Guadalajara (Guadalajara)                    |
| 144 | AI2974 | 5002 | OXA-48 | Hospital de Guadalajara (Guadalajara)                    |
| 145 | AI2975 | 307  | OXA-48 | Hospital de Guadalajara (Guadalajara)                    |
| 146 | AI2976 | 307  | OXA-48 | Hospital de Guadalajara (Guadalajara)                    |
| 147 | AI2977 | 11   | OXA-48 | Hospital de Guadalajara (Guadalajara)                    |
| 148 | AI3043 | 11   | KPC-2  | Hospital de Móstoles (Madrid)                            |
| 149 | AI3044 | 101  | KPC-2  | Hospital Fundación de Alcorcón (Madrid)                  |
| 150 | AI3048 | 11   | KPC-2  | Hospital de Guadalajara (Guadalajara)                    |
| 151 | AI3049 | 101  | KPC-2  | Hospital Fundación de Alcorcón (Madrid)                  |
| 152 | AI3053 | 11   | KPC-2  | U*                                                       |
| 153 | AI3054 | 11   | KPC-2  | U*                                                       |
| 154 | AI3056 | 1961 | KPC-2  | U*                                                       |
| 155 | AN2338 | 512  | KPC-3  | U*                                                       |
| 156 | AN2339 | 258  | KPC-3  | U*                                                       |
| 157 | AI2700 | 1961 | KPC-2  | Complejo Hospitalario de Pontevedra (Pontevedra)         |
| 158 | AI2701 | 273  | KPC-2  | Hospital Universitario Gregorio Marañón (Madrid)         |
| 159 | AI2979 | 1961 | KPC-2  | Complejo Hospitalario de Pontevedra (Pontevedra)         |
| 160 | AI2706 | 512  | KPC-3  | Hospital General La Mancha Centro (Ciudad Real)          |
| 161 | AI2707 | 512  | KPC-3  | Hospital General La Mancha Centro (Ciudad Real)          |
| 162 | AI2709 | 678  | KPC-3  | Hospital de El Escorial (Madrid)                         |
| 163 | AI2980 | 1961 | KPC-2  | Complejo Hospitalario de Pontevedra (Pontevedra)         |
| 164 | AI2982 | 1961 | KPC-2  | Complejo Hospitalario de Pontevedra (Pontevedra)         |
| 165 | AI2713 | 273  | KPC-2  | Hospital Universitario Gregorio Marañón (Madrid)         |
| 166 | AI2717 | 1961 | KPC-2  | Complejo Hospitalario de Pontevedra (Pontevedra)         |
| 167 | AI2985 | 1961 | KPC-2  | Complejo Hospitalario de Pontevedra (Pontevedra)         |
| 168 | AI3060 | 1961 | KPC-2  | Complejo Hospitalario de Pontevedra (Pontevedra)         |
| 169 | AI2722 | 307  | KPC-3  | Hospital San Joan de Deu (Fundación Althaia, Manresa)    |
| 170 | AI2739 | 11   | OXA-48 | Hospital Universitario Marqués de Valdecilla (Santander) |
| 171 | AI2740 | 5000 | OXA-48 | Hospital Universitario Marqués de Valdecilla (Santander) |

|     |        |      |        |                                                          |
|-----|--------|------|--------|----------------------------------------------------------|
| 172 | AI2741 | 5000 | OXA-48 | Hospital Universitario Marqués de Valdecilla (Santander) |
| 173 | AI2743 | 11   | OXA-48 | Hospital Universitario Marqués de Valdecilla (Santander) |
| 174 | AI2989 | 11   | OXA-48 | Hospital Universitario Marqués de Valdecilla (Santander) |
| 175 | AI2745 | 11   | OXA-48 | Hospital Universitario Marqués de Valdecilla (Santander) |
| 176 | AI2746 | 5000 | OXA-48 | Hospital Universitario Marqués de Valdecilla (Santander) |
| 177 | AI2748 | 11   | OXA-48 | Hospital Universitario Marqués de Valdecilla (Santander) |
| 178 | AI2749 | 11   | OXA-48 | Hospital Universitario Marqués de Valdecilla (Santander) |
| 179 | AI2753 | 5000 | OXA-48 | Hospital Universitario Marqués de Valdecilla (Santander) |
| 180 | AI2754 | 5000 | OXA-48 | Hospital Universitario Marqués de Valdecilla (Santander) |
| 181 | AI2755 | 11   | OXA-48 | Hospital Universitario Marqués de Valdecilla (Santander) |
| 182 | AI2756 | 11   | OXA-48 | Hospital Universitario Marqués de Valdecilla (Santander) |
| 183 | AI2757 | 5000 | OXA-48 | Hospital Universitario Marqués de Valdecilla (Santander) |
| 184 | AI3063 | 5000 | OXA-48 | Hospital Universitario Marqués de Valdecilla (Santander) |
| 185 | AI2761 | 5000 | OXA-48 | Hospital Universitario Marqués de Valdecilla (Santander) |
| 186 | AI3064 | 307  | OXA-48 | Clínica Universitaria de Navarra (Navarra)               |
| 187 | AI2763 | 147  | OXA-48 | Hospital Univeristario de Bellvitge (Barcelona)          |
| 188 | AI2767 | 147  | OXA-48 | Hospital Univeristario de Bellvitge (Barcelona)          |
| 189 | AI2768 | 147  | OXA-48 | Hospital Univeristario de Bellvitge (Barcelona)          |
| 190 | AI2769 | 147  | OXA-48 | Hospital Univeristario de Bellvitge (Barcelona)          |
| 191 | AI2770 | 147  | OXA-48 | Hospital Univeristario de Bellvitge (Barcelona)          |
| 192 | AI3065 | 147  | OXA-48 | Hospital Univeristario de Bellvitge (Barcelona)          |
| 193 | AI2771 | 101  | OXA-48 | Hospital Univeristario de Bellvitge (Barcelona)          |
| 194 | AI2996 | 147  | OXA-48 | Hospital Univeristario de Bellvitge (Barcelona)          |
| 195 | AI2998 | 147  | OXA-48 | Hospital Univeristario de Bellvitge (Barcelona)          |
| 196 | AI2775 | 147  | OXA-48 | Hospital Univeristario de Bellvitge (Barcelona)          |
| 197 | AI3001 | 307  | OXA-48 | Hospital Universitario Valencia Tres cruces (Valencia)   |
| 198 | AI2776 | 11   | OXA-48 | Hospital Universitario Valencia Tres cruces (Valencia)   |
| 199 | AI2779 | 437  | NDM-23 | Hospital Universitario Valencia Tres cruces (Valencia)   |
| 200 | AI3002 | 307  | OXA-48 | Hospital Universitario Valencia Tres cruces (Valencia)   |
| 201 | AI2782 | 11   | OXA-48 | Hospital Universitario Valencia Tres cruces (Valencia)   |
| 202 | AI3067 | 15   | OXA-48 | Hospital Universitario Valencia Tres cruces (Valencia)   |
| 203 | AI3003 | 307  | OXA-48 | Hospital Universitario Valencia Tres cruces (Valencia)   |
| 204 | AI2784 | 11   | OXA-48 | Hospital Universitario Valencia Tres cruces (Valencia)   |
| 205 | AI3004 | 307  | OXA-48 | Hospital Universitario Valencia Tres cruces (Valencia)   |
| 206 | AI2785 | 11   | OXA-48 | Hospital Universitario Valencia Tres cruces (Valencia)   |

|     |        |     |        |                                                            |
|-----|--------|-----|--------|------------------------------------------------------------|
| 207 | AI3006 | 307 | OXA-48 | Hospital Universitario Valencia Tres cruces (Valencia)     |
| 208 | AI2787 | 307 | OXA-48 | Hospital Universitario Valencia Tres cruces (Valencia)     |
| 209 | AI3007 | 101 | NDM-1  | Hospital Universitario Valencia Tres cruces (Valencia)     |
| 210 | AI2786 | 307 | OXA-48 | Hospital Universitario Valencia Tres cruces (Valencia)     |
| 211 | AI3069 | 307 | OXA-48 | Hospital Universitario Valencia Tres cruces (Valencia)     |
| 212 | AI2789 | 307 | OXA-48 | Hospital Universitario Valencia Tres cruces (Valencia)     |
| 213 | AI2791 | 307 | OXA-48 | Hospital Universitario Valencia Tres cruces (Valencia)     |
| 214 | AI3009 | 307 | OXA-48 | Hospital Universitario Valencia Tres cruces (Valencia)     |
| 215 | AI2792 | 437 | OXA-48 | Hospital Universitario Valencia Tres cruces (Valencia)     |
| 216 | AI2793 | 437 | NDM    | Hospital Universitario Valencia Tres cruces (Valencia)     |
| 217 | AI2794 | 307 | OXA-48 | Hospital Universitario Valencia Tres cruces (Valencia)     |
| 218 | AI3011 | 13  | OXA-48 | Hospital Vall d'Hebron (Barcelona)                         |
| 219 | AI2801 | 101 | OXA-48 | Hospital Vall d'Hebron (Barcelona)                         |
| 220 | AI2803 | 628 | OXA-48 | Hospital Vall d'Hebron (Barcelona)                         |
| 221 | AI2805 | 512 | KPC-3  | Hospital Reina Sofía (Córdoba)                             |
| 222 | AI2806 | 512 | KPC-3  | Hospital Reina Sofía (Córdoba)                             |
| 223 | AI2807 | 512 | KPC    | Hospital Reina Sofía (Córdoba)                             |
| 224 | AI3070 | 15  | OXA-48 | Hospital Reina Sofía (Córdoba)                             |
| 225 | AI2808 | 512 | KPC-3  | Hospital Reina Sofía (Córdoba)                             |
| 226 | AI2812 | 512 | KPC-3  | Hospital Reina Sofía (Córdoba)                             |
| 227 | AI2814 | 512 | KPC-3  | Hospital Reina Sofía (Córdoba)                             |
| 228 | AI2815 | 512 | KPC-3  | Hospital Reina Sofía (Córdoba)                             |
| 229 | AI3071 | 15  | OXA-48 | Hospital Reina Sofía (Córdoba)                             |
| 230 | AI2816 | 512 | KPC-3  | Hospital Reina Sofía (Córdoba)                             |
| 231 | AI2817 | 512 | KPC-3  | Hospital Reina Sofía (Córdoba)                             |
| 232 | AN2342 | 147 | OXA-48 | Complejo Hospitalario Universitario de A Coruña (A Coruña) |
| 233 | AN2356 | 15  | OXA-48 | Hospital Universitario Lucus Augusti (Lugo)                |
| 234 | -      | 273 | KPC-2  | U*                                                         |
| 235 | -      | 11  | KPC-2  | U*                                                         |
| 236 | -      | 101 | KPC-2  | U*                                                         |
| 237 | -      | 512 | KPC-3  | U*                                                         |
| 238 | -      | 512 | KPC-3  | U*                                                         |
| 239 | -      | 512 | KPC-3  | U*                                                         |
| 240 | -      | 512 | KPC-3  | U*                                                         |
| 241 | -      | 101 | KPC-2  | U*                                                         |













|     |   |   |      |                                                     |
|-----|---|---|------|-----------------------------------------------------|
| 454 | - | - | NCPK | Hospital Universitario Central de Asturias (Oviedo) |
| 455 | - | - | NCPK | Hospital Universitario Central de Asturias (Oviedo) |
| 456 | - | - | NCPK | Hospital Universitario Central de Asturias (Oviedo) |
| 457 | - | - | NCPK | Hospital Universitario Central de Asturias (Oviedo) |
| 458 | - | - | NCPK | Hospital Universitario Central de Asturias (Oviedo) |
| 459 | - | - | NCPK | Hospital Universitario Central de Asturias (Oviedo) |
| 460 | - | - | NCPK | Hospital Universitario Gregorio Marañón (Madrid)    |
| 461 | - | - | NCPK | Hospital Universitario Gregorio Marañón (Madrid)    |
| 462 | - | - | NCPK | Hospital Universitario Gregorio Marañón (Madrid)    |
| 463 | - | - | NCPK | Hospital Universitario Gregorio Marañón (Madrid)    |
| 464 | - | - | NCPK | Hospital Universitario Gregorio Marañón (Madrid)    |
| 465 | - | - | NCPK | Hospital Universitario Gregorio Marañón (Madrid)    |
| 466 | - | - | NCPK | Hospital Universitario Gregorio Marañón (Madrid)    |
| 467 | - | - | NCPK | Hospital Universitario Gregorio Marañón (Madrid)    |
| 468 | - | - | NCPK | Hospital Universitario Gregorio Marañón (Madrid)    |
| 469 | - | - | NCPK | Hospital Universitario Gregorio Marañón (Madrid)    |
| 470 | - | - | NCPK | Hospital Universitario Gregorio Marañón (Madrid)    |
| 471 | - | - | NCPK | Hospital Universitario Gregorio Marañón (Madrid)    |
| 472 | - | - | NCPK | Hospital Universitario Gregorio Marañón (Madrid)    |
| 473 | - | - | NCPK | Hospital Universitario Gregorio Marañón (Madrid)    |
| 474 | - | - | NCPK | Hospital Universitario Gregorio Marañón (Madrid)    |
| 475 | - | - | NCPK | Hospital Universitario Gregorio Marañón (Madrid)    |
| 476 | - | - | NCPK | Hospital Universitario Gregorio Marañón (Madrid)    |
| 477 | - | - | NCPK | Hospital Universitario Gregorio Marañón (Madrid)    |
| 478 | - | - | NCPK | Hospital Universitario Gregorio Marañón (Madrid)    |
| 479 | - | - | NCPK | Hospital Universitario Gregorio Marañón (Madrid)    |

## b. Validation

| Isolate | Sequencing code | ST  | Resistance mechanism | Sample of isolation | Hospital/City where strain was isolated             |
|---------|-----------------|-----|----------------------|---------------------|-----------------------------------------------------|
| 1       | AI2584          | 11  | OXA-48               | Urine               | Hospital Universitario Gregorio Marañón (Madrid)    |
| 2       | AI2591          | 11  | OXA-48               | Respiratory sample  | Hospital Universitario Gregorio Marañón (Madrid)    |
| 3       | AI2592          | 405 | OXA-48               | Urine               | Hospital Universitario Gregorio Marañón (Madrid)    |
| 4       | AI3018          | 15  | OXA-48               | Urine               | Hospital Universitario Gregorio Marañón (Madrid)    |
| 5       | AI2608          | 392 | OXA-48               | Urine               | Hospital Universitario Gregorio Marañón (Madrid)    |
| 6       | AI2610          | 11  | OXA-48               | Urine               | Hospital Universitario Gregorio Marañón (Madrid)    |
| 7       | AI2629          | 512 | KPC-3                | Urine               | Hospital Puerta del Mar (Cádiz)                     |
| 8       | AI2633          | 11  | OXA-48               | Wound               | Hospital Puerta del Mar (Cádiz)                     |
| 9       | AI2837          | 512 | KPC-3                | Wound               | Hospital Puerta del Mar (Cádiz)                     |
| 10      | AI2637          | 429 | OXA-48               | Urine               | Hospital Clínic (Barcelona)                         |
| 11      | AH0325          | 392 | OXA-48               | Urine               | Hospital Clínic (Barcelona)                         |
| 12      | AI2841          | 392 | OXA-48               | Peritoneal fluid    | Hospital Clínic (Barcelona)                         |
| 13      | AI2638          | 307 | OXA-48               | Urine               | Hospital Clínic (Barcelona)                         |
| 14      | AI2612          | 15  | OXA-48               | Urine               | Hospital Arquitecto Marcede (Ferrol)                |
| 15      | AI2849          | 147 | OXA-48               | Urine               | Hospital Universitario Mutua de Terrassa (Terrassa) |
| 16      | AI2854          | 152 | OXA-48               | Wound               | Hospital Universitario Mutua de Terrassa (Terrassa) |
| 17      | AI2855          | 147 | OXA-48               | Urine               | Hospital Universitario Mutua de Terrassa (Terrassa) |
| 18      | AI2863          | 307 | OXA-48               | Abscess             | Hospital Universitario La Paz (Madrid)              |
| 19      | AI3023          | 15  | OXA-48               | Respiratory sample  | Hospital Universitario La Paz (Madrid)              |
| 20      | AI2871          | 11  | OXA-48               | Abscess             | Hospital Universitario Ramón y Cajal (Madrid)       |
| 21      | AI2877          | 11  | OXA-48               | Urine               | Hospital Universitario Ramón y Cajal (Madrid)       |
| 22      | AI2883          | 307 | KPC-3                | Urine               | Hospital Universitario Ramón y Cajal (Madrid)       |
| 23      | AI2886          | 15  | OXA-48               | Urine               | Hospital Universitario Ramón y Cajal (Madrid)       |
| 24      | AI2646          | 307 | KPC-3                | blood culture       | Hospital Universitario Ramón y Cajal (Madrid)       |
| 25      | AI2889          | 307 | KPC-3                | Urine               | Hospital Universitario Ramón y Cajal (Madrid)       |
| 26      | AI2891          | 11  | OXA-48               | Urine               | Hospital Universitario Ramón y Cajal (Madrid)       |
| 27      | AI2910          | 11  | OXA-48               | Urine               | Hospital Universitario La Princesa (Madrid)         |
| 28      | AH0329          | 392 | OXA-48               | Urine               | Hospital Universitario La Princesa (Madrid)         |
| 29      | AI2920          | 392 | OXA-48               | Urine               | Hospital Universitario La Princesa (Madrid)         |
| 30      | AI2921          | 405 | OXA-48               | Urine               | Hospital Universitario La Princesa (Madrid)         |
| 31      | AI2930          | 307 | OXA-48               | Urine               | Hospital Universitario La Princesa (Madrid)         |
| 32      | AI2667          | 485 | OXA-48               | blood culture       | Hospital Universitario Central de Asturias (Oviedo) |
| 33      | AI3031          | 307 | OXA-48               | Urine               | Hospital Universitario Central de Asturias (Oviedo) |

|    |        |      |        |                       |                                                             |
|----|--------|------|--------|-----------------------|-------------------------------------------------------------|
| 34 | AI2664 | 147  | OXA-48 | Urine                 | Hospital Universitario Central de Asturias (Oviedo)         |
| 35 | AI2665 | 15   | OXA-48 | Urine                 | Hospital Universitario Central de Asturias (Oviedo)         |
| 36 | AI2942 | 326  | OXA-48 | blood culture         | Hospital Universitario Central de Asturias (Oviedo)         |
| 37 | AI3036 | 326  | OXA-48 | Wound                 | Hospital Universitario Central de Asturias (Oviedo)         |
| 38 | AI2693 | 567  | OXA-48 | Wound                 | Hospital Universitario Central de Asturias (Oviedo)         |
| 39 | AI2952 | 326  | OXA-48 | Urine                 | Hospital Universitario Central de Asturias (Oviedo)         |
| 40 | AI2954 | 11   | OXA-48 | blood culture culture | Hospital de Guadalajara (Guadalajara)                       |
| 41 | AI2957 | 307  | OXA-48 | Urine                 | Hospital de Guadalajara (Guadalajara)                       |
| 42 | AH0331 | 104  | OXA-48 | Urine                 | Hospital de Guadalajara (Guadalajara)                       |
| 43 | AI2971 | 11   | OXA-48 | Urine                 | Hospital de Guadalajara (Guadalajara)                       |
| 44 | AI3041 | 307  | OXA-48 | Urine                 | Hospital de Guadalajara (Guadalajara)                       |
| 45 | AI3042 | 11   | KPC-2  | blood culture         | Hospital Virgen de la Salud (Toledo)                        |
| 46 | AI3046 | 512  | KPC-3  | Urine                 | Lab. Dr. Echevarne                                          |
| 47 | AI3047 | 11   | KPC-2  | Respiratory sample    | Hospital General Universitario de Ciudad Real (Ciudad Real) |
| 48 | AI3051 | 11   | KPC-2  | -                     | U*                                                          |
| 49 | AI3052 | 11   | KPC-2  | -                     | U*                                                          |
| 50 | AI3055 | 1962 | KPC-2  | Urine                 | Hospital Virgen de la Salud (Toledo)                        |
| 51 | AI2723 | 258  | KPC-3  | Urine                 | Hospital Universitario Virgen de las Nieves (Granada)       |
| 52 | AI2714 | 512  | KPC-3  | blood culture         | Hospital General La Mancha Centro (Ciudad Real)             |
| 53 | AN2341 | 5000 | OXA-48 | Urine                 | Hospital Universitario Marqués de Valdecilla (Santander)    |
| 54 | AI2742 | 11   | OXA-48 | Biopsy                | Hospital Universitario Marqués de Valdecilla (Santander)    |
| 55 | AI2750 | 11   | OXA-48 | Urine                 | Hospital Universitario Marqués de Valdecilla (Santander)    |
| 56 | AI2751 | 5000 | OXA-48 | Wound                 | Hospital Universitario Marqués de Valdecilla (Santander)    |
| 57 | AI3062 | 5000 | OXA-48 | Wound                 | Hospital Universitario Marqués de Valdecilla (Santander)    |
| 58 | AI2764 | 147  | OXA-48 | Respiratory sample    | Hospital Universitario de Bellvitge (Barcelona)             |
| 59 | AI2765 | 147  | OXA-48 | Urine                 | Hospital Universitario de Bellvitge (Barcelona)             |
| 60 | AI2766 | 147  | OXA-48 | Urine                 | Hospital Universitario de Bellvitge (Barcelona)             |
| 61 | AI2993 | 147  | OXA-48 | Wound                 | Hospital Universitario de Bellvitge (Barcelona)             |
| 62 | AI2773 | 307  | OXA-48 | Urine                 | Hospital Universitario de Bellvitge (Barcelona)             |
| 63 | AI2777 | 307  | OXA-48 | Urine                 | Hospital Universitario Valencia Tres cruces (Valencia)      |
| 64 | AI2778 | 11   | OXA-48 | Urine                 | Hospital Universitario Valencia Tres cruces (Valencia)      |
| 65 | AI2780 | 11   | OXA-48 | Respiratory sample    | Hospital Universitario Valencia Tres cruces (Valencia)      |
| 66 | AI2781 | 307  | OXA-48 | Urine                 | Hospital Universitario Valencia Tres cruces (Valencia)      |
| 67 | AI2790 | 11   | OXA-48 | Bile                  | Hospital Universitario Valencia Tres cruces (Valencia)      |
| 68 | AI2800 | 405  | OXA-48 | Bile                  | Hospital Vall d'Hebron (Barcelona)                          |

|     |        |     |        |                    |                                                             |
|-----|--------|-----|--------|--------------------|-------------------------------------------------------------|
| 69  | AI2809 | 512 | KPC-3  | Peritoneal fluid   | Hospital Reina Sofia (Córdoba)                              |
| 70  | AI2810 | 512 | KPC-3  | Wound              | Hospital Reina Sofia (Córdoba)                              |
| 71  | AI2813 | 512 | KPC-3  | Abscess            | Hospital Reina Sofia (Córdoba)                              |
| 72  | AI2811 | 512 | KPC-3  | blood culture      | Hospital Reina Sofia (Córdoba)                              |
| 73  | AN2344 | 15  | OXA-48 | Wound              | Complejo Hospitalario Universitario de A Coruña ( A Coruña) |
| 74  | AN2357 | 15  | OXA-48 | Urine              | Hospital Universitario Lucus Augusti (Lugo)                 |
| 75  | -      | 11  | KPC-2  | -                  | U*                                                          |
| 76  | -      | 101 | KPC-2  | -                  | U*                                                          |
| 77  | -      | 512 | KPC-3  | -                  | U*                                                          |
| 78  | -      | 11  | OXA-48 | -                  | U*                                                          |
| 79  | -      | -   | NCPK   | Urine              | Complejo Hospitalario Universitario de A Coruña ( A Coruña) |
| 80  | -      | -   | NCPK   | Urine              | Complejo Hospitalario Universitario de A Coruña ( A Coruña) |
| 81  | -      | -   | NCPK   | Urine              | Complejo Hospitalario Universitario de A Coruña ( A Coruña) |
| 82  | -      | -   | NCPK   | Urine              | Complejo Hospitalario Universitario de A Coruña ( A Coruña) |
| 83  | -      | -   | NCPK   | Urine              | Complejo Hospitalario Universitario de A Coruña ( A Coruña) |
| 84  | -      | -   | NCPK   | Respiratory sample | Complejo Hospitalario Universitario de A Coruña ( A Coruña) |
| 85  | -      | -   | NCPK   | Urine              | Complejo Hospitalario Universitario de A Coruña ( A Coruña) |
| 86  | -      | -   | NCPK   | Urine              | Complejo Hospitalario Universitario de A Coruña ( A Coruña) |
| 87  | -      | -   | NCPK   | Urine              | Complejo Hospitalario Universitario de A Coruña ( A Coruña) |
| 88  | -      | -   | NCPK   | Urine              | Complejo Hospitalario Universitario de A Coruña ( A Coruña) |
| 89  | -      | -   | NCPK   | Wound              | Complejo Hospitalario Universitario de A Coruña ( A Coruña) |
| 90  | -      | -   | NCPK   | Urine              | Complejo Hospitalario Universitario de A Coruña ( A Coruña) |
| 91  | -      | -   | NCPK   | Urine              | Complejo Hospitalario Universitario de A Coruña ( A Coruña) |
| 92  | -      | -   | NCPK   | Urine              | Complejo Hospitalario Universitario de A Coruña ( A Coruña) |
| 93  | -      | -   | NCPK   | Urine              | Complejo Hospitalario Universitario de A Coruña ( A Coruña) |
| 94  | -      | -   | NCPK   | Urine              | Complejo Hospitalario Universitario de A Coruña ( A Coruña) |
| 95  | -      | -   | NCPK   | Urine              | Complejo Hospitalario Universitario de A Coruña ( A Coruña) |
| 96  | -      | -   | NCPK   | Urine              | Complejo Hospitalario Universitario de A Coruña ( A Coruña) |
| 97  | -      | -   | NCPK   | Urine              | Complejo Hospitalario Universitario de A Coruña ( A Coruña) |
| 98  | -      | -   | NCPK   | Urine              | Complejo Hospitalario Universitario de A Coruña ( A Coruña) |
| 99  | -      | -   | NCPK   | Urine              | Complejo Hospitalario Universitario de A Coruña ( A Coruña) |
| 100 | -      | -   | NCPK   | Urine              | Complejo Hospitalario Universitario de A Coruña ( A Coruña) |
| 101 | -      | -   | NCPK   | Urine              | Complejo Hospitalario Universitario de A Coruña ( A Coruña) |
| 102 | -      | -   | NCPK   | Respiratory sample | Complejo Hospitalario Universitario de A Coruña ( A Coruña) |
| 103 | -      | -   | NCPK   | Urine              | Complejo Hospitalario Universitario de A Coruña ( A Coruña) |
| 104 | -      | -   | NCPK   | Urine              | Complejo Hospitalario Universitario de A Coruña ( A Coruña) |
| 105 | -      | -   | NCPK   | Respiratory sample | Complejo Hospitalario Universitario de A Coruña ( A Coruña) |
| 106 | -      | -   | NCPK   | Urine              | Complejo Hospitalario Universitario de A Coruña ( A Coruña) |
| 107 | -      | -   | NCPK   | Urine              | Complejo Hospitalario Universitario de A Coruña ( A Coruña) |
| 108 | -      | -   | NCPK   | Urine              | Complejo Hospitalario Universitario de A Coruña ( A Coruña) |
| 109 | -      | -   | NCPK   | Urine              | Complejo Hospitalario Universitario de A Coruña ( A Coruña) |







|     |   |   |      |                    |                                                             |
|-----|---|---|------|--------------------|-------------------------------------------------------------|
| 196 | - | - | NCPK | Urine              | Complejo Hospitalario Universitario de A Coruña ( A Coruña) |
| 197 | - | - | NCPK | Urine              | Complejo Hospitalario Universitario de A Coruña ( A Coruña) |
| 198 | - | - | NCPK | Urine              | Complejo Hospitalario Universitario de A Coruña ( A Coruña) |
| 199 | - | - | NCPK | Urine              | Complejo Hospitalario Universitario de A Coruña ( A Coruña) |
| 200 | - | - | NCPK | Urine              | Complejo Hospitalario Universitario de A Coruña ( A Coruña) |
| 201 | - | - | NCPK | Urine              | Complejo Hospitalario Universitario de A Coruña ( A Coruña) |
| 202 | - | - | NCPK | Urine              | Complejo Hospitalario Universitario de A Coruña ( A Coruña) |
| 203 | - | - | NCPK | Urine              | Complejo Hospitalario Universitario de A Coruña ( A Coruña) |
| 204 | - | - | NCPK | Urine              | Complejo Hospitalario Universitario de A Coruña ( A Coruña) |
| 205 | - | - | NCPK | Urine              | Hospital Universitario Central de Asturias (Oviedo)         |
| 206 | - | - | NCPK | Urine              | Hospital Universitario Central de Asturias (Oviedo)         |
| 207 | - | - | NCPK | Urine              | Hospital Universitario Central de Asturias (Oviedo)         |
| 208 | - | - | NCPK | Urine              | Hospital Universitario Central de Asturias (Oviedo)         |
| 209 | - | - | NCPK | Urine              | Hospital Universitario Central de Asturias (Oviedo)         |
| 210 | - | - | NCPK | Urine              | Hospital Universitario Central de Asturias (Oviedo)         |
| 211 | - | - | NCPK | Urine              | Hospital Universitario Central de Asturias (Oviedo)         |
| 212 | - | - | NCPK | Wound              | Hospital Universitario Central de Asturias (Oviedo)         |
| 213 | - | - | NCPK | Urine              | Hospital Universitario Central de Asturias (Oviedo)         |
| 214 | - | - | NCPK | Urine              | Hospital Universitario Central de Asturias (Oviedo)         |
| 215 | - | - | NCPK | Urine              | Hospital Universitario Central de Asturias (Oviedo)         |
| 216 | - | - | NCPK | Wound              | Hospital Universitario Central de Asturias (Oviedo)         |
| 217 | - | - | NCPK | Wound              | Hospital Universitario Central de Asturias (Oviedo)         |
| 218 | - | - | NCPK | blood culture      | Hospital Universitario Gregorio Marañón (Madrid)            |
| 219 | - | - | NCPK | urine              | Hospital Universitario Gregorio Marañón (Madrid)            |
| 220 | - | - | NCPK | respiratory sample | Hospital Universitario Gregorio Marañón (Madrid)            |
| 221 | - | - | NCPK | catheter           | Hospital Universitario Gregorio Marañón (Madrid)            |
| 222 | - | - | NCPK | respiratory sample | Hospital Universitario Gregorio Marañón (Madrid)            |
| 223 | - | - | NCPK | blood culture      | Hospital Universitario Gregorio Marañón (Madrid)            |
| 224 | - | - | NCPK | blood culture      | Hospital Universitario Gregorio Marañón (Madrid)            |
| 225 | - | - | NCPK | blood culture      | Hospital Universitario Gregorio Marañón (Madrid)            |
| 226 | - | - | NCPK | blood culture      | Hospital Universitario Gregorio Marañón (Madrid)            |
| 227 | - | - | NCPK | abscess            | Hospital Universitario Gregorio Marañón (Madrid)            |
| 228 | - | - | NCPK | respiratory sample | Hospital Universitario Gregorio Marañón (Madrid)            |
| 229 | - | - | NCPK | blood culture      | Hospital Universitario Gregorio Marañón (Madrid)            |
| 230 | - | - | NCPK | blood culture      | Hospital Universitario Gregorio Marañón (Madrid)            |
| 231 | - | - | NCPK | urine              | Hospital Universitario Gregorio Marañón (Madrid)            |
| 232 | - | - | NCPK | wound              | Hospital Universitario Gregorio Marañón (Madrid)            |
| 233 | - | - | NCPK | blood culture      | Hospital Universitario Gregorio Marañón (Madrid)            |
| 234 | - | - | NCPK | blood culture      | Hospital Universitario Gregorio Marañón (Madrid)            |
| 235 | - | - | NCPK | blood culture      | Hospital Universitario Gregorio Marañón (Madrid)            |
| 236 | - | - | NCPK | wound              | Hospital Universitario Gregorio Marañón (Madrid)            |

\*U: unknown origin

**Table 2.** MALDI-TOF MS based CPK optimized hyperparameters for: a) CPK identification and b) differentiation of the carbapenemase type.

a)

| Method                          | Algorithm** | C <sup>1</sup> | n Estimators <sup>2</sup> | Min simples leaf <sup>3</sup> | Min simples split <sup>4</sup> | n Neighbors <sup>5</sup> |
|---------------------------------|-------------|----------------|---------------------------|-------------------------------|--------------------------------|--------------------------|
| <b>M<sub>LINEAR</sub></b>       | PCA-SVM     | 0.01           | -                         | -                             | -                              | -                        |
|                                 | SVM         | 0.001          | -                         | -                             | -                              | --                       |
|                                 | RF          | -              | 600                       | 1                             | 2                              | -                        |
|                                 | NCA-KNN     | -              | -                         | -                             | -                              | 8                        |
|                                 | KNN         | -              | -                         | -                             | -                              | 2                        |
| <b>M<sub>THRESHOLD</sub></b>    | PCA-SVM*    | 0.001          | -                         | -                             | -                              | -                        |
|                                 | SVM         | 1              | -                         | -                             | -                              | -                        |
|                                 | RF          | -              | 600                       | 1                             | 2                              | -                        |
|                                 | NCA-KNN     | -              | -                         | -                             | -                              | 2                        |
|                                 | KNN         | -              | -                         | -                             | -                              | 5                        |
| <b>M<sub>LINEAR-3K</sub></b>    | PCA-SVM     | 0.1            | -                         | -                             | -                              | -                        |
|                                 | SVM         | 0.001          | -                         | -                             | -                              | -                        |
|                                 | RF          | -              | 200                       | 1                             | 2                              | -                        |
|                                 | NCA-KNN     | -              | -                         | -                             | -                              | 9                        |
|                                 | KNN         | -              | -                         | -                             | -                              | 8                        |
| <b>M<sub>THRESHOLD-3K</sub></b> | PCA-SVM*    | 0.1            | -                         | -                             | -                              | -                        |
|                                 | SVM         | 0.001          | -                         | -                             | -                              | -                        |
|                                 | RF          | -              | 200                       | 1                             | 2                              | -                        |
|                                 | NCA-KNN     | -              | -                         | -                             | -                              | 8                        |
|                                 | KNN         | -              | -                         | -                             | -                              | 9                        |

b)

| Method                       | Algorithm | C  | n Estimators | Min simples leaf | Min simples split | n Neighbors |
|------------------------------|-----------|----|--------------|------------------|-------------------|-------------|
| <b>M<sub>LINEAR</sub></b>    | SVM       | 10 |              | --               | -                 | -           |
|                              | RF        | -  | 100          | 1                | 2                 | -           |
|                              | NCA-KNN   | -  | --           |                  | -                 | 6           |
|                              | KNN       | -  | -            | -                | -                 | 3           |
| <b>M<sub>THRESHOLD</sub></b> | SVM       | 10 | -            | -                | -                 | -           |
|                              | RF        | -  | 600          | 1                | 2                 | -           |
|                              | NCA-KNN   | -  |              | -                | -                 | 6           |

|                           |         |       |     |   |   |   |
|---------------------------|---------|-------|-----|---|---|---|
|                           | KNN     | -     | -   | - | - | 3 |
| $M_{\text{LINEAR-3K}}$    | SVM     | 10    | -   | - | - | - |
|                           | RF      | -     | 200 | 1 | 2 |   |
|                           | NCA-KNN | -     | -   | - | - | 3 |
|                           | KNN     | -     | -   | - | - | 3 |
| $M_{\text{THRESHOLD-3K}}$ | SVM     | 0.001 | -   | - | - | - |
|                           | RF      | -     | 600 | 1 | 2 |   |
|                           | NCA-KNN | -     | -   | - | - | 6 |
|                           | KNN     | -     | -   | - | - | 3 |

<sup>1</sup> C Regularization parameter of SVM. The strength of the regularization is inversely proportional to C, must be strictly positive.

<sup>2</sup> n Estimators, the number of trees in the forest

<sup>3</sup> Min samples leaf, the minimum number of samples required to be at a leaf node

<sup>4</sup> Min samples split, the minimum number of samples required to split an internal node all for RF

<sup>5</sup> n Neighbors, number of neighbors to use for KNN.

\*Filter peaks mode on: Only peaks that appear in at least 80% of the spectra of each category are used for the analysis.

\*\*Note that PLS does not use hyperparameters.

**Table 3.** MALDI-TOF MS-based CPK prediction with detailed metrics for all method-analytical algorithm combinations. All values are percentages.

a.1)

| Method                    | Algorithm | Accuracy | F1 Score | Sensitivity | Specificity |
|---------------------------|-----------|----------|----------|-------------|-------------|
| $M_{\text{LINEAR}}$       | PLS       | 99.37    | 99.39    | 100         | 98.71       |
|                           | PCA-SVM   | 95.37    | 95.47    | 95.87       | 94.85       |
|                           | SVM       | 99.58    | 99.59    | 100         | 99.14       |
|                           | RF        | 99.79    | 99.79    | 100         | 99.57       |
|                           | NCA-KNN   | 97.05    | 97.15    | 98.76       | 95.28       |
|                           | KNN       | 95.79    | 96.03    | 100         | 91.42       |
| $M_{\text{THRESHOLD}}$    | PLS       | 98.95    | 98.98    | 99.59       | 98.28       |
|                           | PCA-SVM   | 87.58    | 87.63    | 86.36       | 88.84       |
|                           | SVM       | 99.16    | 99.18    | 99.59       | 98.71       |
|                           | RF        | 99.37    | 99.38    | 99.59       | 99.14       |
|                           | NCA-KNN   | 98.95    | 98.96    | 98.76       | 99.14       |
|                           | KNN       | 97.26    | 97.35    | 98.76       | 95.71       |
| $M_{\text{LINEAR-3K}}$    | PLS       | 99.37    | 99.39    | 100         | 98.71       |
|                           | PCA-SVM   | 95.58    | 95.69    | 96.28       | 94.85       |
|                           | SVM       | 99.37    | 99.39    | 100         | 98.71       |
|                           | RF        | 99.79    | 99.79    | 99.59       | 100         |
|                           | NCA-KNN   | 97.89    | 97.97    | 99.59       | 96.14       |
|                           | KNN       | 96.42    | 96.61    | 100         | 92.7        |
| $M_{\text{THRESHOLD-3K}}$ | PLS       | 98.11    | 98.17    | 99.59       | 96.57       |
|                           | PCA-SVM   | 89.68    | 90.06    | 91.74       | 87.55       |
|                           | SVM       | 98.53    | 98.57    | 99.59       | 97.42       |
|                           | RF        | 98.11    | 98.13    | 97.93       | 98.28       |
|                           | NCA-KNN   | 97.26    | 97.32    | 97.52       | 97          |
|                           | KNN       | 94.32    | 94.46    | 95.04       | 93.56       |

a.2)

| Method                 | Algorithm | Accuracy |
|------------------------|-----------|----------|
| $M_{\text{LINEAR}}$    | PLS       | 87.6     |
|                        | SVM       | 89.26    |
|                        | RF        | 90.91    |
|                        | NCA-KNN   | 87.19    |
|                        | KNN       | 85.12    |
| $M_{\text{THRESHOLD}}$ | PLS       | 86.36    |
|                        | SVM       | 86.36    |
|                        | RF        | 90.08    |
|                        | NCA-KNN   | 84.71    |

|                           |         |       |
|---------------------------|---------|-------|
|                           | KNN     | 83.88 |
| $M_{\text{LINEAR-3K}}$    | PLS     | 85.54 |
|                           | SVM     | 89.67 |
|                           | RF      | 90.91 |
|                           | NCA-KNN | 88.84 |
|                           | KNN     | 83.47 |
| $M_{\text{THRESHOLD-3K}}$ | PLS     | 88.84 |
|                           | SVM     | 85.54 |
|                           | RF      | 89.67 |
|                           | NCA-KNN | 86.36 |
|                           | KNN     | 84.71 |

b.1)

| Method                    | Algorithm | Accuracy | F1 Score | Sensitivity | Specificity |
|---------------------------|-----------|----------|----------|-------------|-------------|
| $M_{\text{LINEAR}}$       | PLS       | 96.09    | 94.48    | 100         | 94.12       |
|                           | PCA-SVM   | 90.43    | 87.36    | 98.7        | 86.27       |
|                           | SVM       | 97.39    | 96.25    | 100         | 96.08       |
|                           | RF        | 97.83    | 96.85    | 100         | 96.73       |
|                           | NCA-KNN   | 90       | 87.01    | 100         | 84.97       |
|                           | KNN       | 91.3     | 88.5     | 100         | 86.93       |
| $M_{\text{THRESHOLD}}$    | PLS       | 88.7     | 85.56    | 100         | 83.01       |
|                           | PCA-SVM   | 74.78    | 70.71    | 90.91       | 66.67       |
|                           | SVM       | 97.83    | 96.85    | 100         | 96.73       |
|                           | RF        | 95.65    | 93.9     | 100         | 93.46       |
|                           | NCA-KNN   | 82.17    | 78.3     | 96.1        | 75.16       |
|                           | KNN       | 82.61    | 78.95    | 97.4        | 75.16       |
| $M_{\text{LINEAR-3K}}$    | PLS       | 95.22    | 93.33    | 100         | 92.81       |
|                           | PCA-SVM   | 91.3     | 88.5     | 100         | 86.93       |
|                           | SVM       | 96.52    | 95.06    | 100         | 94.77       |
|                           | RF        | 96.96    | 95.65    | 100         | 95.42       |
|                           | NCA-KNN   | 91.3     | 88.5     | 100         | 86.93       |
|                           | KNN       | 90       | 87.01    | 100         | 84.97       |
| $M_{\text{THRESHOLD-3K}}$ | PLS       | 85.22    | 81.92    | 100         | 77.78       |
|                           | PCA-SVM   | 75.65    | 73.08    | 98.7        | 64.05       |
|                           | SVM       | 88.26    | 85.08    | 100         | 82.35       |
|                           | RF        | 85.65    | 82.35    | 100         | 78.43       |
|                           | NCA-KNN   | 78.7     | 75.86    | 100         | 67.97       |
|                           | KNN       | 81.3     | 75.98    | 88.31       | 77.78       |

b.2)

| Method                          | Algorithm | Accuracy |
|---------------------------------|-----------|----------|
| <b>M<sub>LINEAR</sub></b>       | PLS       | 85.71    |
|                                 | SVM       | 93.51    |
|                                 | RF        | 98.7     |
|                                 | NCA-KNN   | 96.1     |
|                                 | KNN       | 85.71    |
| <b>M<sub>THRESHOLD</sub></b>    | PLS       | 76.62    |
|                                 | SVM       | 84.42    |
|                                 | RF        | 94.81    |
|                                 | NCA-KNN   | 87.01    |
|                                 | KNN       | 84.42    |
| <b>M<sub>LINEAR-3k</sub></b>    | PLS       | 84.42    |
|                                 | SVM       | 94.81    |
|                                 | RF        | 92.66    |
|                                 | NCA-KNN   | 97.4     |
|                                 | KNN       | 83.12    |
| <b>M<sub>THRESHOLD-3k</sub></b> | PLS       | 85.71    |
|                                 | SVM       | 88.31    |
|                                 | RF        | 94.81    |
|                                 | NCA-KNN   | 85.71    |
|                                 | KNN       | 83.12    |

Results of the prediction performance and quality metrics for evaluation of all tested combinations of methods-analytical algorithms in each scenario a) training set and b) validation set, for 1) CPK prediction and 2) identification of the carbapenemase type. All values represent percentages.



**Table 4.** Metrics detailed information for all methods-algorithms of analysis combinations regarding the AUROC and AUPRC.

a) Identification of CPK

| <b>M<sub>FULL</sub></b>    |                | <b>AUROC</b> | <b>AUPRC</b> | <b>AP</b> |
|----------------------------|----------------|--------------|--------------|-----------|
|                            | <b>PLS</b>     | 0,988        | 0,96         | 0,95      |
| <b>SVM</b>                 | 0,983          | 0,89         | 0,9          |           |
| <b>PCA-SVM</b>             | 0,962          | 0,85         | 0,86         |           |
| <b>RF</b>                  | 1              | 1            | 1            |           |
| <b>M<sub>FULL-3K</sub></b> |                |              |              |           |
|                            | <b>PLS</b>     | 0,989        | 0,96         | 0,95      |
|                            | <b>SVM</b>     | 0,986        | 0,9          | 0,91      |
|                            | <b>PCA-SVM</b> | 0,963        | 0,88         | 0,88      |
| <b>RF</b>                  | 1              | 1            | 1            |           |

a) Identification of the type of carbapenemase

| <b>OXA-48</b>              |            |       |       |      | <b>KPC</b>                 |            |       |       |      |
|----------------------------|------------|-------|-------|------|----------------------------|------------|-------|-------|------|
| <b>M<sub>FULL</sub></b>    |            | AUROC | AUPRC | AP   | <b>M<sub>FULL</sub></b>    |            | AUROC | AUPRC | AP   |
|                            | <b>PLS</b> | 0,948 | 0,98  | 0,98 |                            | <b>PLS</b> | 0,948 | 0,89  | 0,89 |
|                            | <b>SVM</b> | 0,967 | 0,99  | 0,99 |                            | <b>SVM</b> | 0,964 | 0,95  | 0,95 |
|                            | <b>RF</b>  | 0,978 | 0,99  | 0,99 |                            | <b>RF</b>  | 0,975 | 0,97  | 0,97 |
| <b>M<sub>FULL-3K</sub></b> |            |       |       |      | <b>M<sub>FULL-3K</sub></b> |            |       |       |      |
|                            | <b>PLS</b> | 0,95  | 0,98  | 0,98 |                            | <b>PLS</b> | 0,95  | 0,98  | 0,98 |
|                            | <b>SVM</b> | 0,965 | 0,98  | 0,99 |                            | <b>SVM</b> | 0,961 | 0,95  | 0,95 |
|                            | <b>RF</b>  | 0,979 | 0,99  | 0,99 |                            | <b>RF</b>  | 0,982 | 0,97  | 0,98 |

**Figure 1.** Receiver operating characteristic curves values for the validation stage by area under curve (AUC) and precision–recall curves values obtained by AUC and average precision (AP) methods of best-performance for CPK prediction after applying the RF algorithm.

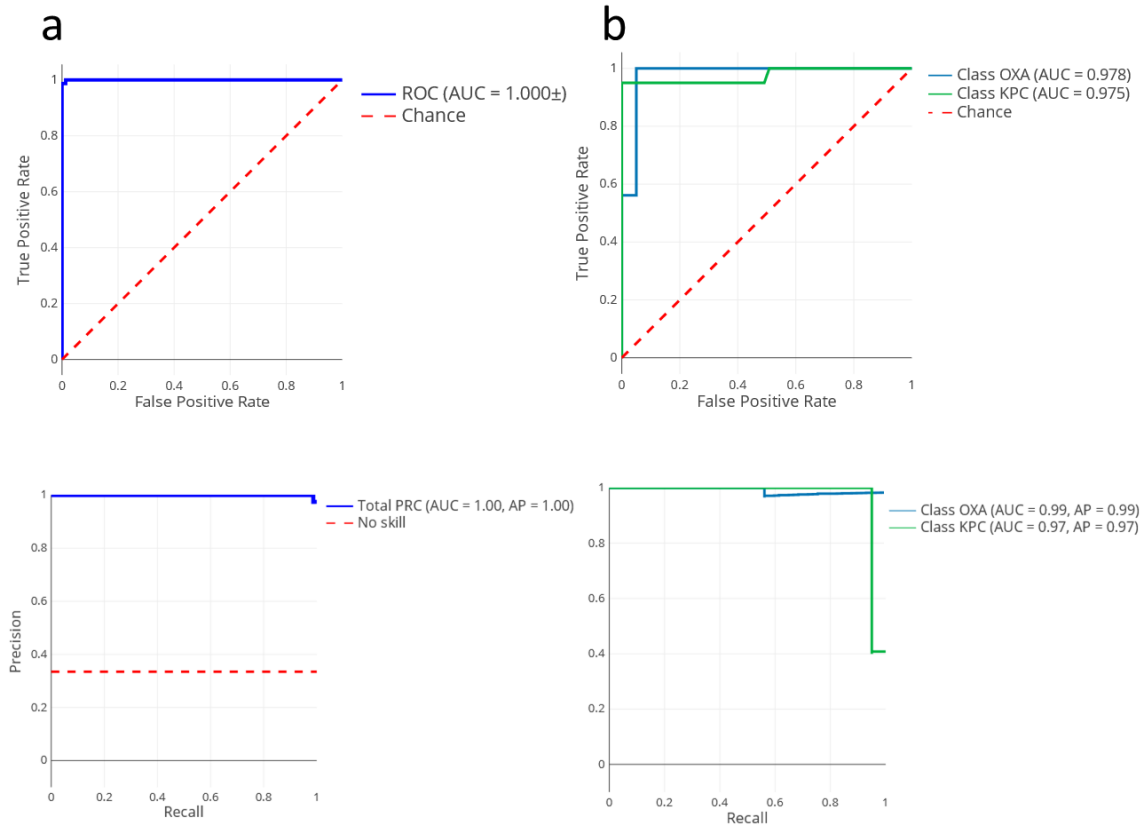

a) AUROC and AUPRC for CPK prediction applying the RF algorithm and the  $M_{\text{LINEAR}}$  method.

b) AUROC and AUPRC for differentiation of the carbapenemase type after applying the RF algorithm and the  $M_{\text{LINEAR}}$  method.
